# Supplementary material for: FOLFIRINOX after first-line gemcitabine-based chemotherapy in advanced pancreatic cancer: a retrospective comparison with FOLFOX and FOLFIRI schedules
Source: PubMed Central journal article supplement — Ther Adv Med Oncol. 2020 Sep 29;12:1758835920947970. doi: 10.1177/1758835920947970 (PMC7533956; doi:10.1177/1758835920947970), 2020-09-29

**Supplementary Table 1.** First line treatments for patients included in the final analysis.

| First line chemotherapy      | FOLFIRINOX<br>n. patients (%) | FOLFOX<br>n. patients (%) | FOLFIRI<br>n. patients (%) |
|------------------------------|-------------------------------|---------------------------|----------------------------|
| Gemcitabine                  | 0                             | 0                         | 0                          |
| Gemcitabine + Nab-paclitaxel | 15 (100%)                     | 31 (97%)                  | 30 (100%)                  |
| Gemcitabine + Capecitabine   | 0                             | 1 (3%)                    | 0                          |
| Gemcitabine + Oxaliplatin    | 0                             | 0                         | 0                          |

**Supplementary Figure 1.** Forest plot of the Treatment effect on PFS in Subgroup analysis. (a) Forest plot of the Treatment effect on PFS between FOLFIRINOX and FOLFOX-6. (b) Forest plot of the Treatment effect on PFS between FOLFIRINOX and FOLFIRI. (c) Forest plot of the Treatment effect on PFS between FOLFOX-6 and FOLFIRI.

a

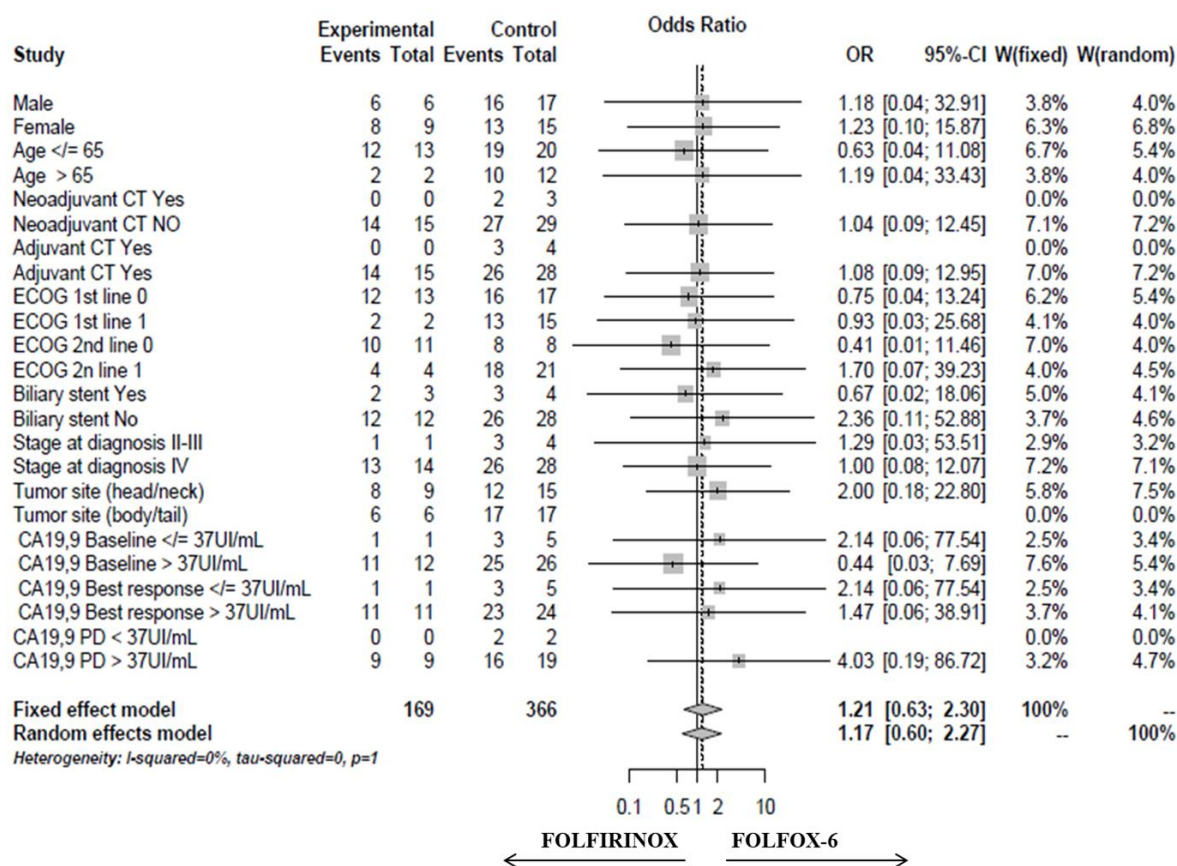

b

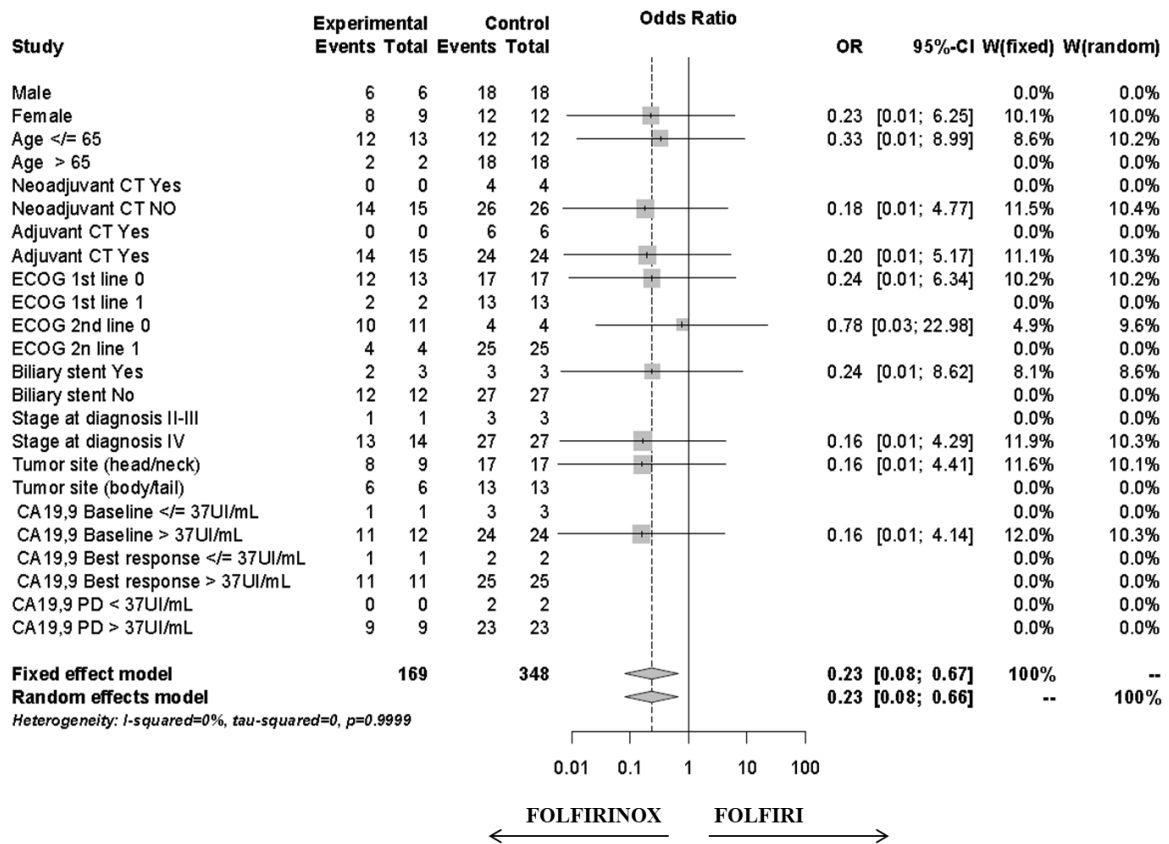

C

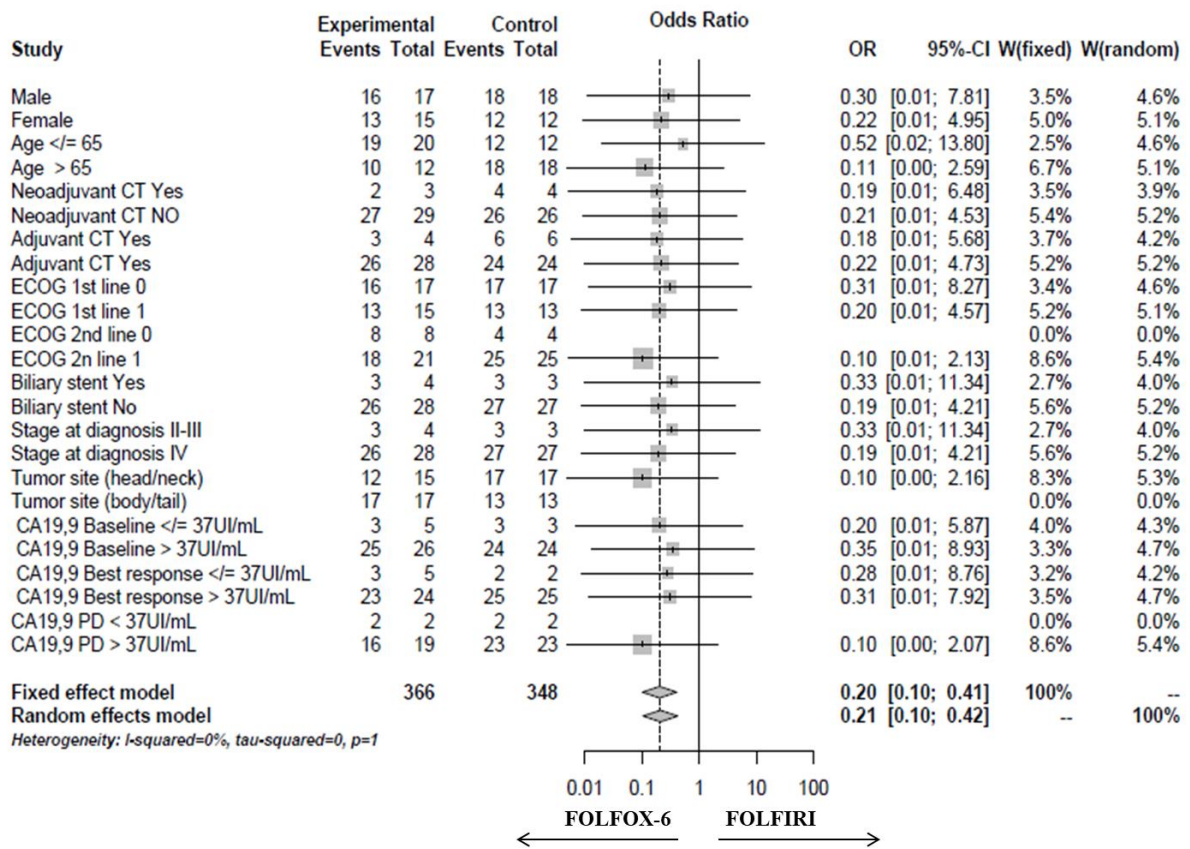

**Supplementary Figure 2.** Forest plot of the Treatment effect on OS1 in Subgroup analysis. **(a)** Forest plot of the Treatment effect on OS1 between FOLFIRINOX and FOLFOX-6. **(b)** Forest plot of the Treatment effect on OS1 between FOLFIRINOX and FOLFIRI.

a

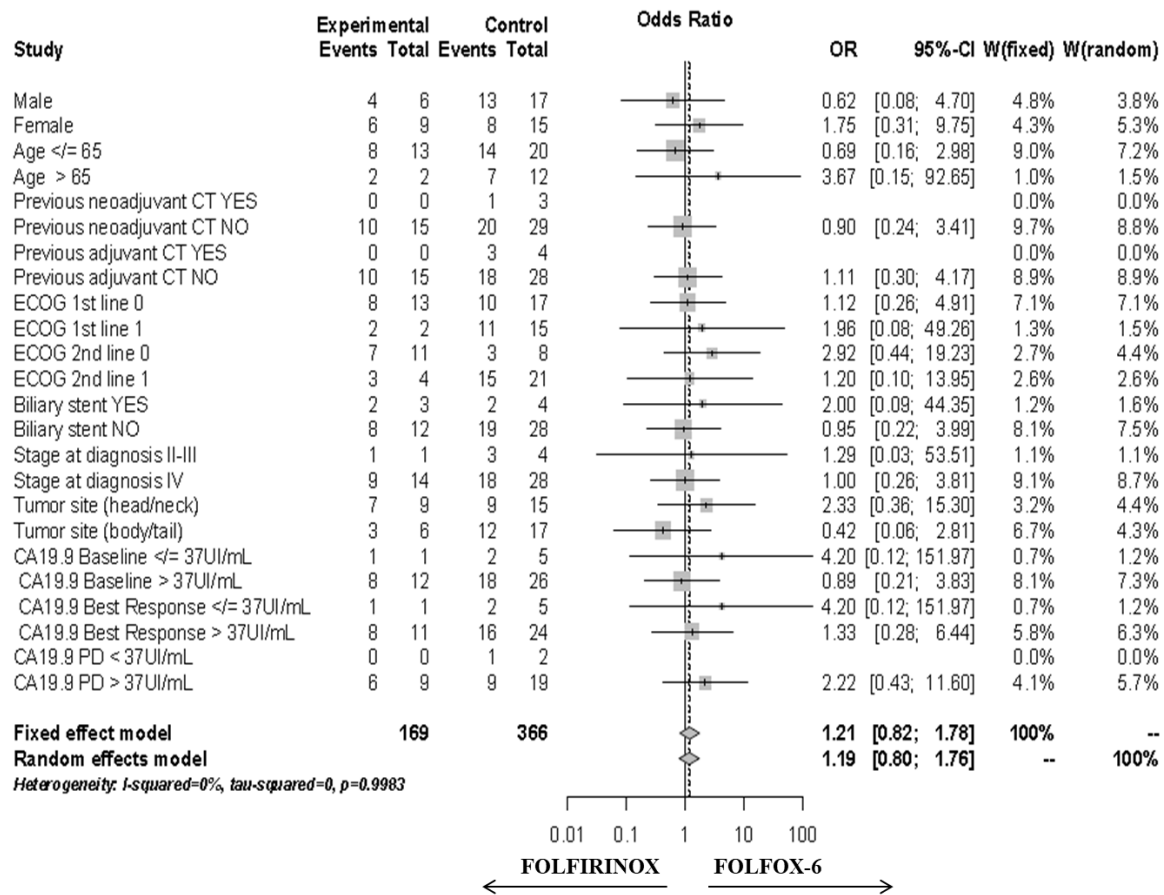

b

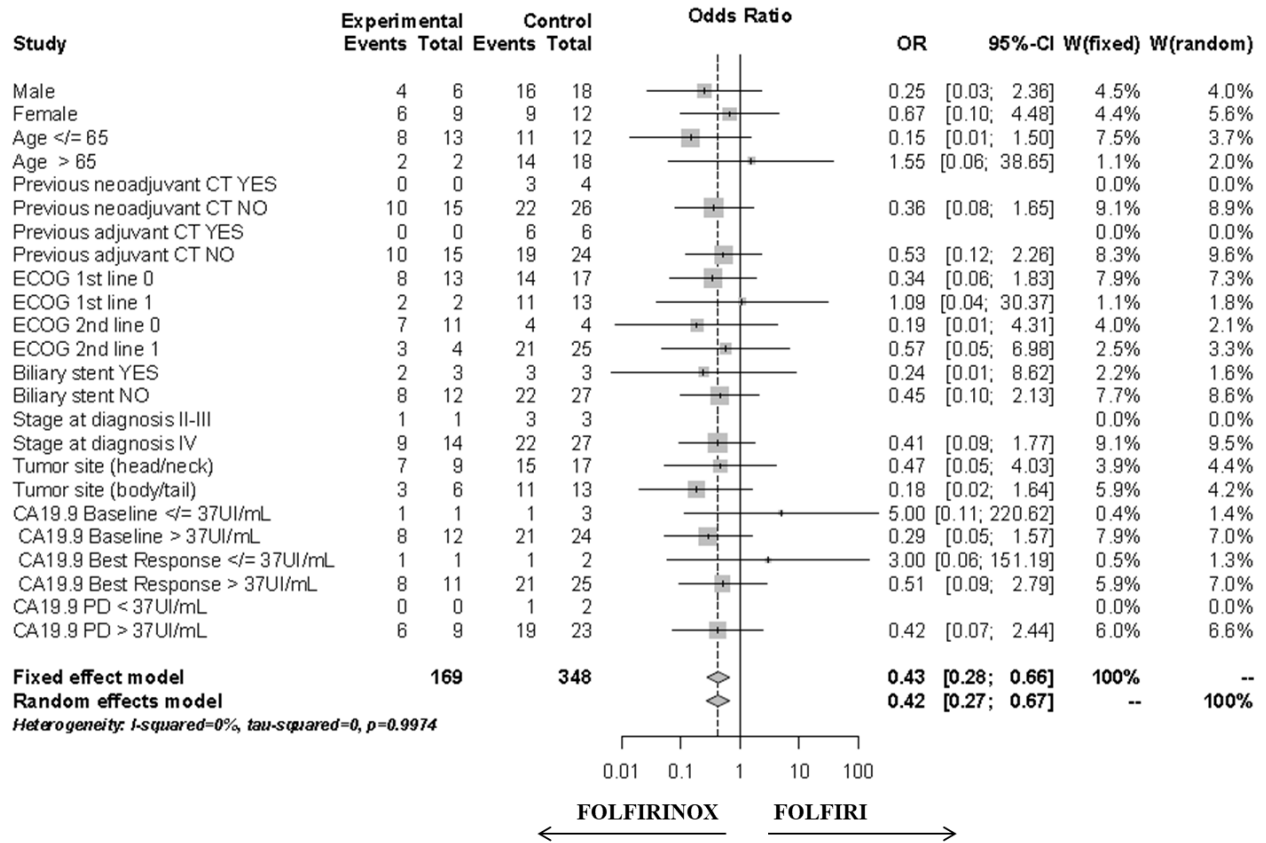

**Supplementary Figure 3.** Forest plot of the Treatment effect on OS2 in Subgroup analysis. (a) Forest plot of the Treatment effect on OS2 between FOLFIRINOX and FOLFOX-6. (b) Forest plot of the Treatment effect on OS2 between FOLFIRINOX and FOLFIRI. (c) Forest plot of the Treatment effect on OS2 between FOLFOX-6 and FOLFIRI.

a

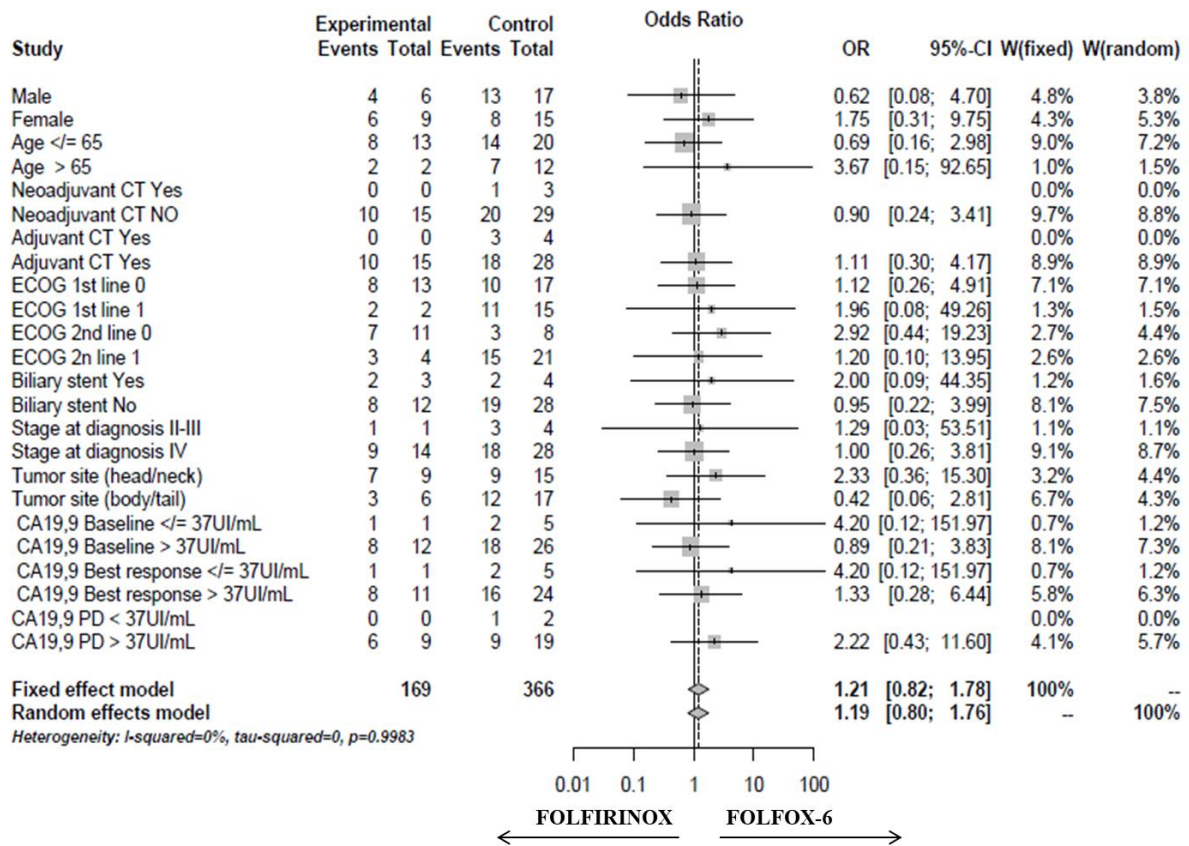

b

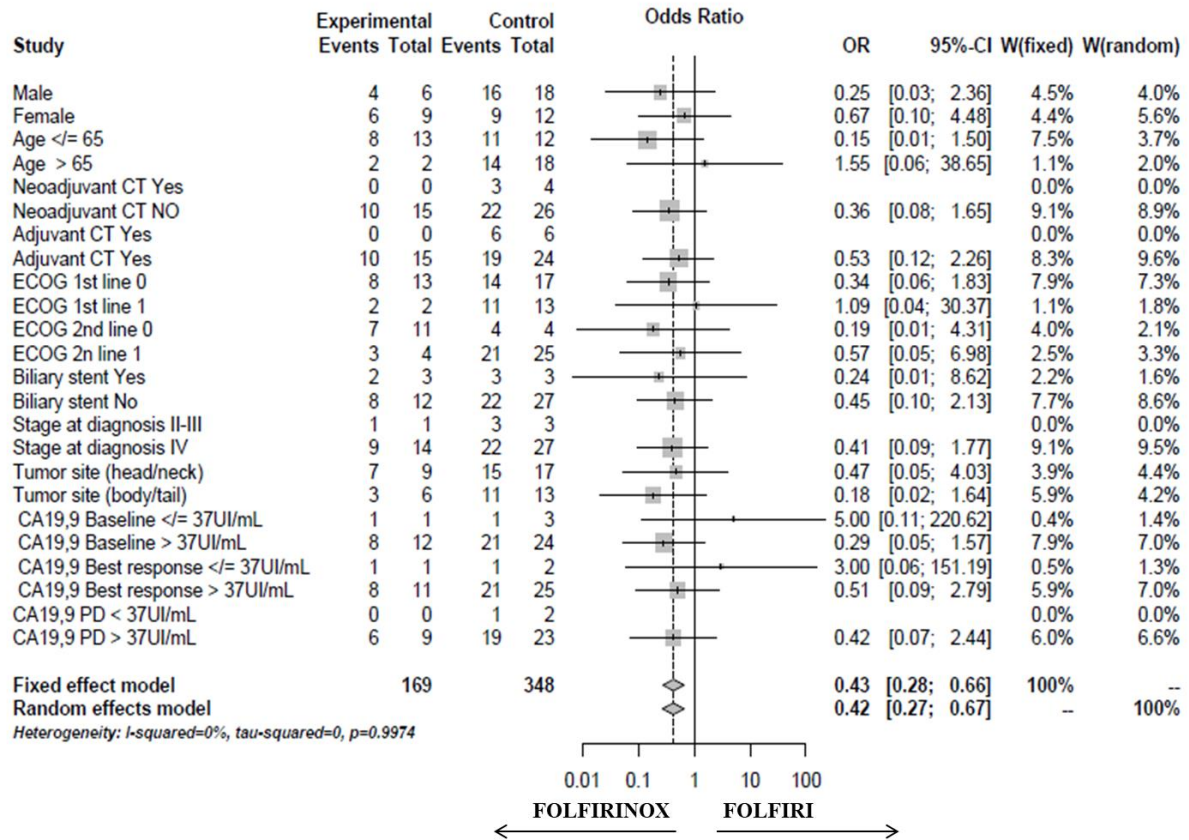

C

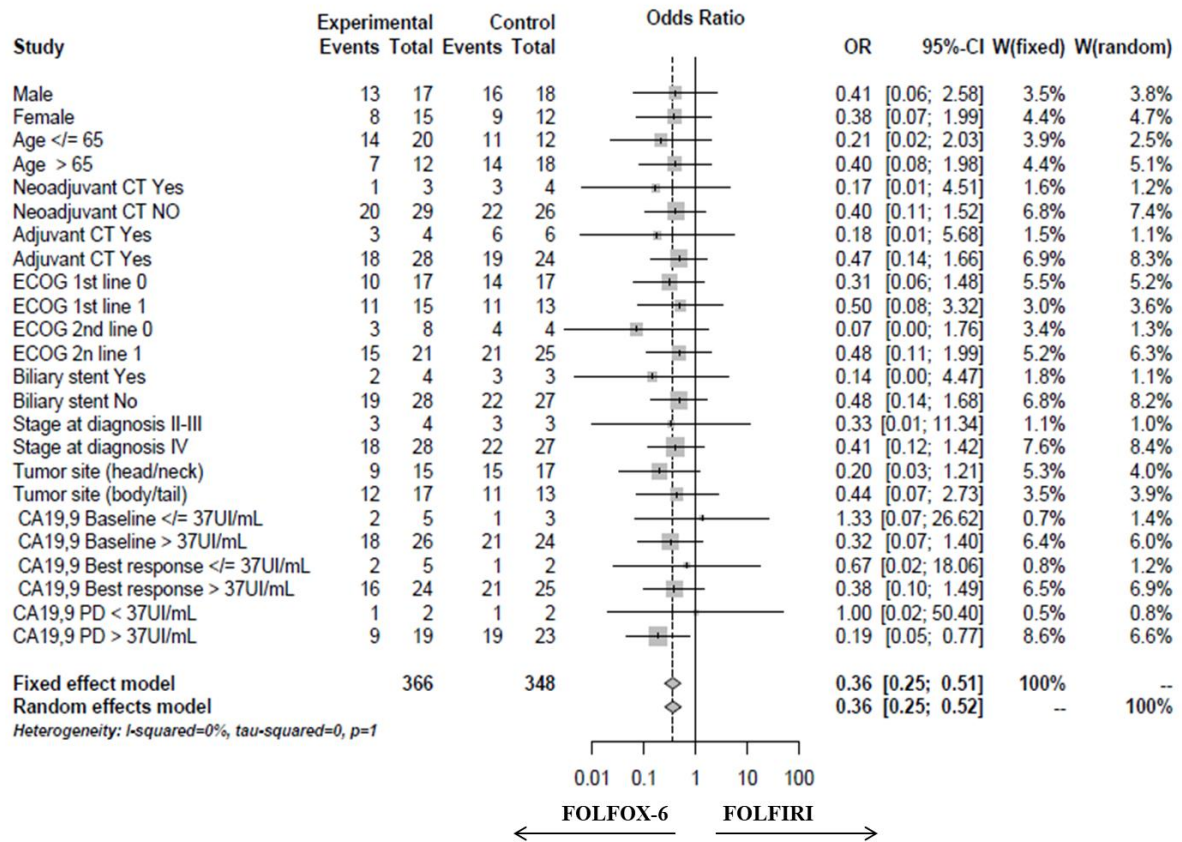

Supplement: Supplementary_Materials_1.pdf [file Supplementary_Materials_1.pdf]
